# Supplementary material for: A smart switchable bioinspired copper foam responding to different pH droplets for reversible oil–water separation
Source: Royal Society of Chemistry journal article supplement (doi:10.1039/c6ta10772a), 2017-01-01
Supplement: c6ta10772a6.pdf [file c6ta10772a6.pdf]

## Supporting information for

# A smart switchable bioinspired copper foam corresponding to different pH droplet for reversible oil-water separation

Yan Liu<sup>a,\*</sup>, Kaiteng Zhang<sup>a</sup>, Yan Son<sup>a</sup>, Wei Zhang<sup>a</sup>, Lena Marie Spindler<sup>b</sup>, Zhiwu Han<sup>a</sup>, Luquan Ren<sup>a</sup>

A. Key Laboratory of Bionic Engineering (Ministry of Education), Jilin University, Changchun 130022, P.R. China; b. University of Stuttgart Institute of Textile Technology and Process Engineering Denkendorf, Germany.

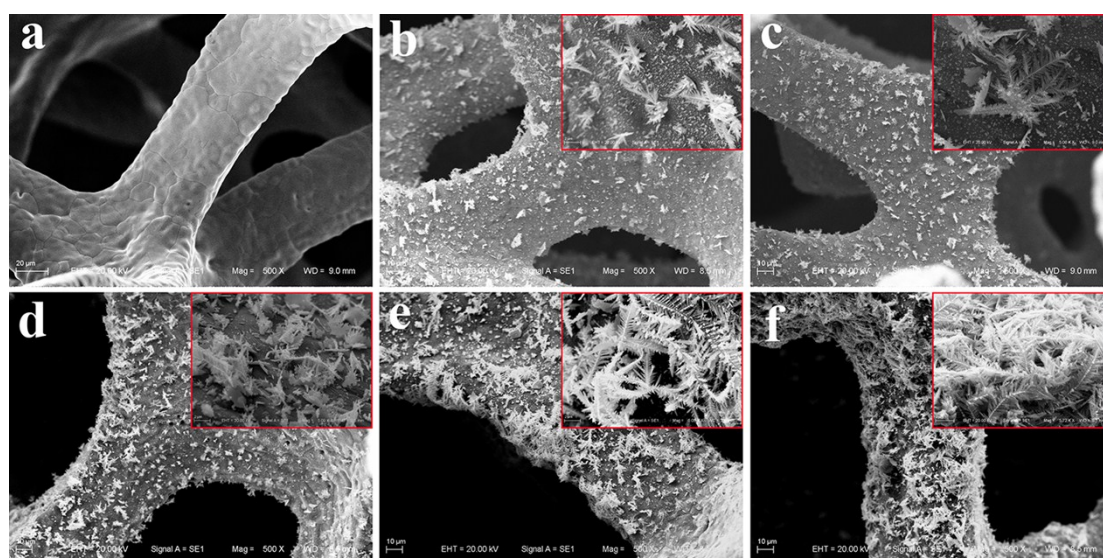

Figure S1 Surface morphology of (a) the untreated copper foam and (b-f) copper foam after immersion in the solution of AgNO<sub>3</sub> solution for 5, 10, 15, 20, 25 s.

---

\* Corresponding author. Tel.: +86 431 85095760; fax: +86 431 85095575

E-mail address: liuyan2000@jlu.edu.cn

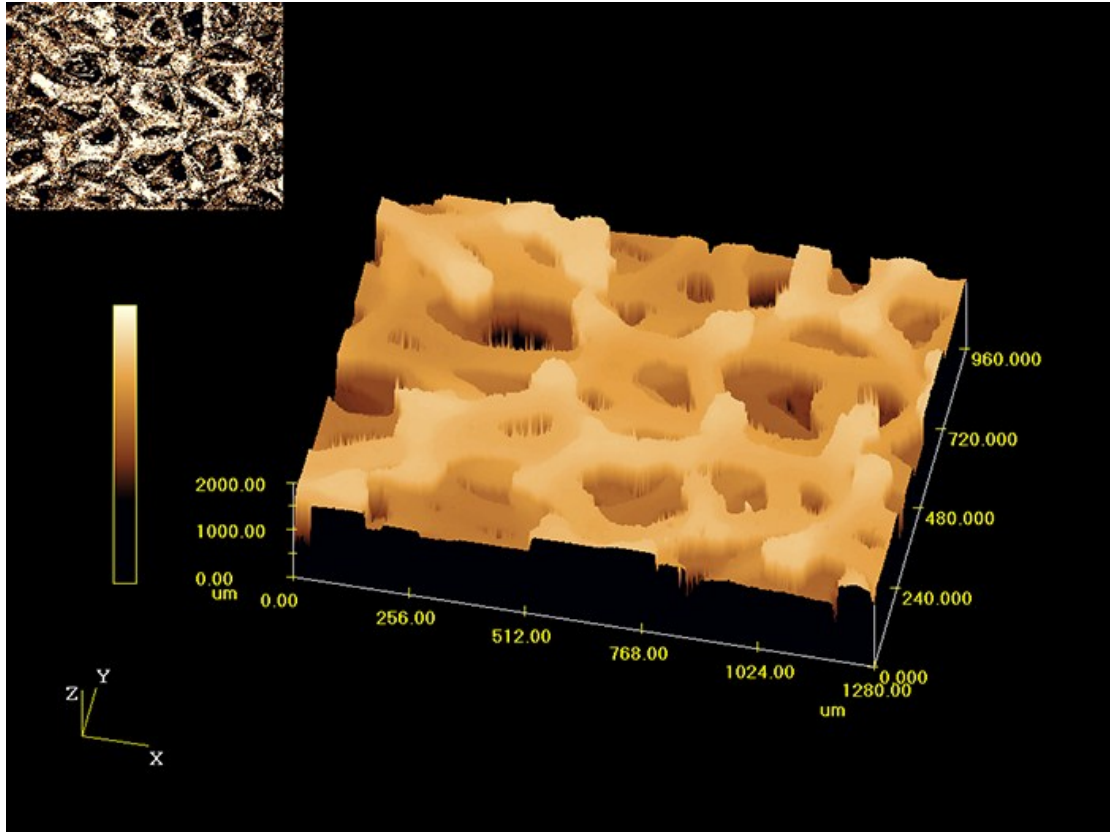

Figure S2 Confocal laser scanning microscope image of the as-prepared copper foam. (SRa=289.2 $\mu$ m)

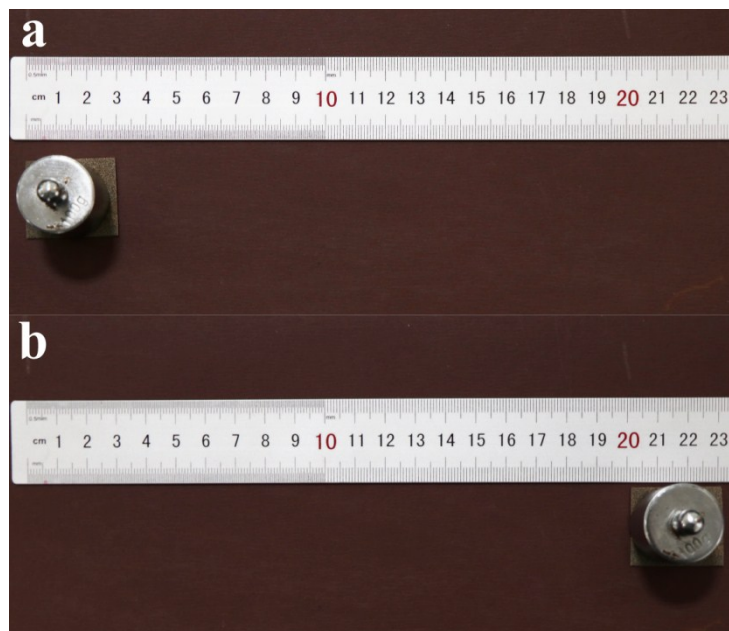

Figure S3 (a) and (b) Photographs showing the abrasion process.

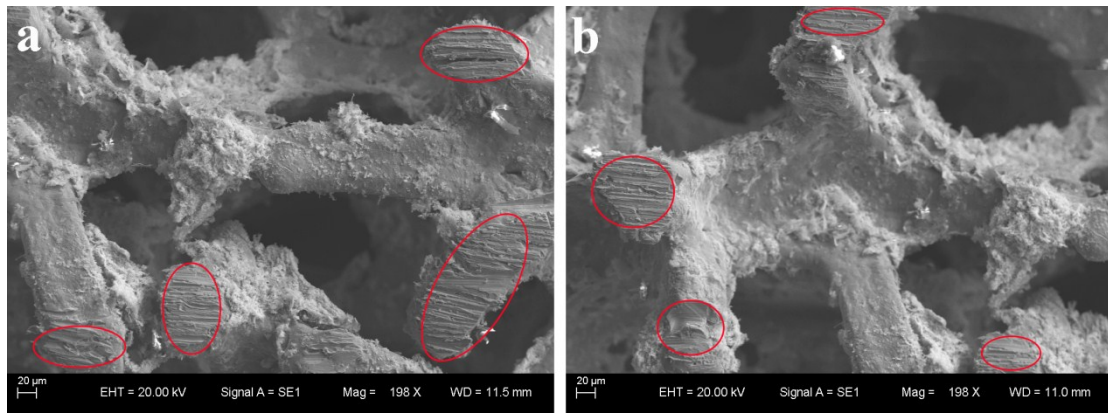

Figure S4 SEM images of as-prepared copper foam(a-b) after abrasion for 20 cycles.
